# Supplementary material for: Evidence of disease severity, cognitive and physical outcomes of dance interventions for persons with Parkinson’s Disease: a systematic review and meta-analysis
Source: PubMed Central journal article supplement (PMC8456607; doi:10.1186/s12877-021-02446-w), 2021-09-22
Supplement: 12877_2021_2446_MOESM1_ESM.pdf [file 12877_2021_2446_MOESM1_ESM.pdf]

# **Evidence of disease severity, cognitive and physical outcomes of dance interventions for persons with Parkinson's Disease: a systematic review and meta-analysis**

Sophia Rasheeqa Ismail<sup>1\*</sup>, Shaun Wen Huey Lee<sup>2</sup>, Dafna Merom<sup>3</sup>, Puteri Sofia Nadira Megat Kamaruddin<sup>1</sup>, Min San Chong<sup>4</sup>, Terence Ong<sup>4</sup>, Nai Ming Lai<sup>2,5</sup>

<sup>1</sup> Institute for Medical Research, National Institutes of Health, Ministry of Health, Malaysia

<sup>2</sup> School of Pharmacy, Monash University Malaysia, Malaysia

<sup>3</sup> University of Western Sydney, Australia

<sup>4</sup> University of Malaya Medical Centre, Malaysia.

<sup>5</sup> School of Medicine, Faculty of Health and Medical Sciences, Taylor's University Malaysia

## Additional File 1

### Key references to tools used in the evaluation of major outcomes in the review

| Outcome                                                                          | Tool                                                      | Citation of key reference                                                                                                                                                                                                                                                                                                                                                                                         |
|----------------------------------------------------------------------------------|-----------------------------------------------------------|-------------------------------------------------------------------------------------------------------------------------------------------------------------------------------------------------------------------------------------------------------------------------------------------------------------------------------------------------------------------------------------------------------------------|
| Disease severity (motor, behaviour, mentation, mood, activities of daily living) | MDS- Unified Parkinson's Disease Rating Scale (MDS-UPDRS) | Goetz CG, Tilley BC, Shaftman SR, Stebbins GT, Fahn S, Martinez-Martin P, Poewe W, Sampaio C, Stern MB, Dodel R <i>et al</i> : <b>Movement Disorder Society-sponsored revision of the Unified Parkinson's Disease Rating Scale (MDS-UPDRS): scale presentation and clinimetric testing results.</b> <i>Movement disorders : official journal of the Movement Disorder Society</i> 2008, <b>23</b> (15):2129-2170. |
| Balance                                                                          | Mini Best Test                                            | King L, Horak F: <b>On the Mini-BESTest: Scoring and the Reporting of Total Scores.</b> <i>Physical Therapy</i> 2013, <b>93</b> (4):571-575.                                                                                                                                                                                                                                                                      |
|                                                                                  | Berg's Balance Scale                                      | Berg K, Wood-Dauphinee S, Williams JI: <b>The Balance Scale: reliability assessment with elderly residents and patients with an acute stroke.</b> <i>Scandinavian journal of rehabilitation medicine</i> 1995, <b>27</b> (1):27-36.                                                                                                                                                                               |
|                                                                                  | Spinal-mouse inclination score                            | S Keller, AF Mannion, Grob D: <b>Reliability of a new measuring device („spinalmouse“) in recording the sagittal profile of the back.</b> <i>Eur Spine J</i> 2000, <b>9</b> (4):283-313.                                                                                                                                                                                                                          |
|                                                                                  | Activities-specific Balance Confidence Scale (ABC)        | Powell LE, Myers AM: <b>The Activities-specific Balance Confidence (ABC) Scale.</b> <i>The journals of gerontology Series A, Biological sciences and medical sciences</i> 1995, <b>50a</b> (1):M28-34.                                                                                                                                                                                                            |
| Gait and mobility                                                                | Freezing of Gait Questionnaire                            | Giladi N, Tal J, Azulay T, Rascol O, Brooks DJ, Melamed E, Oertel W, Poewe WH, Stocchi F, Tolosa E: <b>Validation of the freezing of gait questionnaire in patients with Parkinson's disease.</b> <i>Movement disorders : official journal of the Movement Disorder Society</i> 2009, <b>24</b> (5):655-661.                                                                                                      |
|                                                                                  | Six-minute Walk Test                                      | Garber CE, Friedman JH: <b>Effects of fatigue on physical activity and function in patients with Parkinson's disease.</b> <i>Neurology</i> 2003, <b>60</b> (7):1119-1124.                                                                                                                                                                                                                                         |
|                                                                                  | Standing-start 180° turn test                             | Stack E, Ashburn A: <b>Dysfunctional turning in Parkinson's disease.</b> <i>Disability and Rehabilitation</i> 2008, <b>30</b> (16):1222-1229.                                                                                                                                                                                                                                                                     |
|                                                                                  | Time-up-and-go (TUG) test                                 | Podsiadlo D, Richardson S: <b>The timed "Up &amp; Go": a test of basic functional mobility for frail elderly persons.</b> <i>Journal of the American Geriatrics Society</i> 1991, <b>39</b> (2):142-148.                                                                                                                                                                                                          |
|                                                                                  | Five Times Sit-to-Stand Test                              | Duncan RP, Leddy AL, Earhart GM: <b>Five times sit-to-stand test performance in Parkinson's disease.</b> <i>Archives of physical medicine and rehabilitation</i> 2011, <b>92</b> (9):1431-1436.                                                                                                                                                                                                                   |
|                                                                                  | Sit-and-Reach Test                                        | Bozic PR, Pazin NR, Berjan BB, Planic NM, Cuk ID: <b>Evaluation of the field tests of flexibility of the lower extremity: reliability and the concurrent and factorial</b>                                                                                                                                                                                                                                        |

|                                             |                                                                                                                                |                                                                                                                                                                                                                                                                                                                                                                               |
|---------------------------------------------|--------------------------------------------------------------------------------------------------------------------------------|-------------------------------------------------------------------------------------------------------------------------------------------------------------------------------------------------------------------------------------------------------------------------------------------------------------------------------------------------------------------------------|
|                                             |                                                                                                                                | <b>validity.</b> <i>Journal of strength and conditioning research</i> 2010, <b>24</b> (9):2523-2531.                                                                                                                                                                                                                                                                          |
|                                             | Back Scratch Test                                                                                                              | Roberta ER, Jones CJ: <b>Development and Validation of a Functional Fitness Test for Community-Residing Older Adults.</b> <i>Journal of Aging and Physical Activity</i> 1999, <b>7</b> (2):129-161.                                                                                                                                                                           |
|                                             | Nine-hole peg test                                                                                                             | Earhart GM, Cavanaugh JT, Ellis T, Ford MP, Foreman KB, Dibble L: <b>The 9-hole PEG test of upper extremity function: average values, test-retest reliability, and factors contributing to performance in people with Parkinson disease.</b> <i>Journal of neurologic physical therapy : JNPT</i> 2011, <b>35</b> (4):157-163.                                                |
|                                             | Purdue pegboard                                                                                                                | Desrosiers J, Hébert R, Bravo G, Dutil E: <b>The Purdue Pegboard Test: normative data for people aged 60 and over.</b> <i>Disabil Rehabil</i> 1995, <b>17</b> (5):217-224.                                                                                                                                                                                                    |
| Risk of fall                                | Falls questionnaire (Canadian Community Health Survey (CCHS)— Healthy Aging (May, 2010) adapted to focus on the past 3 months. | <a href="https://www.statcan.gc.ca/eng/statistical-programs/document/5146_D1_T1_V1-eng.pdf">https://www.statcan.gc.ca/eng/statistical-programs/document/5146_D1_T1_V1-eng.pdf</a>                                                                                                                                                                                             |
| Cognitive/Mood outcomes                     | Montreal Cognitive Assessment (MoCA)                                                                                           | Nazem S, Siderowf AD, Duda JE, Have TT, Colcher A, Horn SS, Moberg PJ, Wilkinson JR, Hurtig HI, Stern MB <i>et al</i> : <b>Montreal cognitive assessment performance in patients with Parkinson's disease with "normal" global cognition according to mini-mental state examination score.</b> <i>Journal of the American Geriatrics Society</i> 2009, <b>57</b> (2):304-308. |
|                                             | Depression: Beck's Depression Inventory                                                                                        | Beck AT, Ward CH, Mendelson M, Mock J, Erbaugh J: <b>An inventory for measuring depression.</b> <i>Archives of general psychiatry</i> 1961, <b>4</b> :561-571.                                                                                                                                                                                                                |
|                                             | Apathy: Apathy Scale                                                                                                           | Starkstein SE, Mayberg HS, Preziosi TJ, Andrezejewski P, Leiguarda R, Robinson RG: <b>Reliability, validity, and clinical correlates of apathy in Parkinson's disease.</b> <i>The Journal of neuropsychiatry and clinical neurosciences</i> 1992, <b>4</b> (2):134-139.                                                                                                       |
|                                             | Fatigue: Krupp Fatigue Severity Scale                                                                                          | Alves G, Wentzel-Larsen T, Larsen JP: <b>Is fatigue an independent and persistent symptom in patients with Parkinson disease?</b> <i>Neurology</i> 2004, <b>63</b> (10):1908-1911.                                                                                                                                                                                            |
| Participation in activities of daily living | Activity Card Sort                                                                                                             | Baum C, Edwards D: <b>Activity Card Sort (ACS).</b> Bethesda, MD: AOTA Press 2008.                                                                                                                                                                                                                                                                                            |
| Quality of life                             | Parkinson's Disease Questionnaire - 39 (PDQ-39)                                                                                | Peto V, Jenkinson C, Fitzpatrick R: PDQ-39: a review of the development, validation and application of a Parkinson's disease quality of life questionnaire and its associated measures. <i>Journal of neurology</i> 1998, <b>245</b> Suppl 1:S10-14.                                                                                                                          |

|  |                                                                 |                                                                                                                                                                                                                                      |
|--|-----------------------------------------------------------------|--------------------------------------------------------------------------------------------------------------------------------------------------------------------------------------------------------------------------------------|
|  | Brief<br>Multidimensional<br>Life Satisfaction<br>Scale (BMLSS) | Büssing A, Fischer J, Haller A, Heusser P, Ostermann T, Matthiessen PF: <b>Validation of the brief multidimensional life satisfaction scale in patients with chronic diseases.</b> <i>Eur J Med Res</i> 2009, <b>14</b> (4):171-177. |
|--|-----------------------------------------------------------------|--------------------------------------------------------------------------------------------------------------------------------------------------------------------------------------------------------------------------------------|
