# Supplementary material for: Evidence of disease severity, cognitive and physical outcomes of dance interventions for persons with Parkinson’s Disease: a systematic review and meta-analysis
Source: PubMed Central journal article supplement (PMC8456607; doi:10.1186/s12877-021-02446-w), 2021-09-22
Supplement: 12877_2021_2446_MOESM6_ESM.pdf [file 12877_2021_2446_MOESM6_ESM.pdf]

**Evidence of disease severity, cognitive and physical outcomes of dance interventions for persons with Parkinson's Disease: a systematic review and meta-analysis**

Sophia Rasheeqa Ismail<sup>1\*</sup>, Shaun Wen Huey Lee<sup>2</sup>, Dafna Merom<sup>3</sup>, Puteri Sofia Nadira Megat Kamaruddin<sup>1</sup>, Min San Chong<sup>4</sup>, Terence Ong<sup>4</sup>, Nai Ming Lai<sup>2,5</sup>

<sup>1</sup> Institute for Medical Research, National Institutes of Health, Ministry of Health, Malaysia

<sup>2</sup> School of Pharmacy, Monash University Malaysia, Malaysia

<sup>3</sup> University of Western Sydney, Australia

<sup>4</sup> University of Malaya Medical Centre, Malaysia.

<sup>5</sup> School of Medicine, Faculty of Health and Medical Sciences, Taylor's University Malaysia

## Additional File 6

### Outcome data for the study with skewed data

#### Study information from Shanahan 2017

| Outcome                                         | Dance median | Dance IQR | Dance no | Control median | Control IQR | Control no | p value |
|-------------------------------------------------|--------------|-----------|----------|----------------|-------------|------------|---------|
| Disease severity: MDS-UPDRS 3                   | 12           | 7-23      | 20       | 18             | 8.5-24      | 21         | 0.07    |
| Quality of life (PDQ 39)                        | 11.5         | 8-22      | 20       | 12             | 10-29.5     | 21         | 0.43    |
| Walking distance: six-minute walk test (meters) | 385          | 315-515   | 20       | 350            | 300-480     | 21         | 0.33    |
| Balance: Mini-BEST Test                         | 24           | 22.5-26   | 20       | 22.5           | 18-25       | 21         | 0.28    |
