# Supplementary material for: Evidence of disease severity, cognitive and physical outcomes of dance interventions for persons with Parkinson’s Disease: a systematic review and meta-analysis
Source: PubMed Central journal article supplement (PMC8456607; doi:10.1186/s12877-021-02446-w), 2021-09-22
Supplement: 12877_2021_2446_MOESM7_ESM.pdf [file 12877_2021_2446_MOESM7_ESM.pdf]

# **Evidence of disease severity, cognitive and physical outcomes of dance interventions for persons with Parkinson's Disease: a systematic review and meta-analysis**

Sophia Rasheeqa Ismail<sup>1\*</sup>, Shaun Wen Huey Lee<sup>2</sup>, Dafna Merom<sup>3</sup>, Puteri Sofia Nadira Megat Kamaruddin<sup>1</sup>, Min San Chong<sup>4</sup>, Terence Ong<sup>4</sup>, Nai Ming Lai<sup>2,5</sup>

<sup>1</sup> Institute for Medical Research, National Institutes of Health, Ministry of Health, Malaysia

<sup>2</sup> School of Pharmacy, Monash University Malaysia, Malaysia

<sup>3</sup> University of Western Sydney, Australia

<sup>4</sup> University of Malaya Medical Centre, Malaysia.

<sup>5</sup> School of Medicine, Faculty of Health and Medical Sciences, Taylor's University Malaysia

## Additional File 7

### Summary of all outcome estimates

#### 1 Dance versus control

| Outcome or Subgroup                                        | Studies | Participants | Statistical Method                   | Effect Estimate         |
|------------------------------------------------------------|---------|--------------|--------------------------------------|-------------------------|
| 1.1 Disease severity : MDS-UPDRS I                         | 2       | 23           | Mean Difference (IV, Random, 95% CI) | -3.50 [-18.68, 11.67]   |
| 1.2 Disease severity : MDS-UPDRS II                        | 2       | 23           | Mean Difference (IV, Random, 95% CI) | -2.09 [-7.57, 3.40]     |
| 1.3 Disease severity : MDS-SPDRS III                       | 7       |              | Mean Difference (IV, Random, 95% CI) | Subtotals only          |
| 1.3.1 At 3 months                                          | 5       | 148          | Mean Difference (IV, Random, 95% CI) | -691 [-9.97, -3.84]     |
| 1.3.2 At 6 months                                          | 3       | 131          | Mean Difference (IV, Random, 95% CI) | -7.26 [-11.68, -2.85]   |
| 1.3.3 At 12 months                                         | 2       | 62           | Mean Difference (IV, Random, 95% CI) | -14.91 [-19.77, -10.05] |
| 1.4 Disease severity : MDS-UPDRS IV-dyskinesia             | 1       | 33           | Mean Difference (IV, Random, 95% CI) | -0.10 [-0.79, 0.59]     |
| 1.5 Disease severity : MDS-UPDRS IV-fluctuation            | 1       | 33           | Mean Difference (IV, Random, 95% CI) | 0.60 [-0.92, 2.12]      |
| 1.6 Balance : Mini-Best Test                               | 3       | 95           | Mean Difference (IV, Random, 95% CI) | 4.47 [2.29, 6.66]       |
| 1.7 Balance : Berg Balance Scale                           | 5       |              | Mean Difference (IV, Random, 95% CI) | Subtotals only          |
| 1.7.1 At 2 months                                          | 1       | 41           | Mean Difference (IV, Random, 95% CI) | 1.10 [-0.81, 3.01]      |
| 1.7.2 At 3 months                                          | 2       | 32           | Mean Difference (IV, Random, 95% CI) | 8.42 [3.68, 13.17]      |
| 1.7.3 At 4 months                                          | 1       | 48           | Mean Difference (IV, Random, 95% CI) | 5.10 [-0.00, 10.20]     |
| 1.7.4 At 6 months                                          | 1       | 46           | Mean Difference (IV, Random, 95% CI) | -1.60 [-4.54, 1.34]     |
| 1.8 Activity specific balance confidence                   | 1       | 46           | Mean Difference (IV, Random, 95% CI) | 0.20 [-12.72, 13.12]    |
| 1.9 Freezing of gait questionnaire                         | 3       | 89           | Mean Difference (IV, Random, 95% CI) | -0.38 [-2.99; 2.24]     |
| 1.10 Timed Up and Go Test (seconds)                        | 7       | 200          | Mean Difference (IV, Random, 95% CI) | -1.16 [-2.17, -0.15]    |
| 1.11 Five Times Sit-to-Stand Test (seconds)                | 1       | 19           | Mean Difference (IV, Random, 95% CI) | -4.90 [-6.51, -3.29]    |
| 1.12 Sit-and-Reach Test (cm)                               | 1       | 19           | Mean Difference (IV, Random, 95% CI) | 4.60 [-2.78, 11.98]     |
| 1.13 Walking distance : Six-minute-walk test (meters)      | 4       | 123          | Mean Difference (IV, Random, 95% CI) | 57.08 [-54.63, 168.78]  |
| 1.13.1 Tango with other dance types                        | 3       | 104          | Mean Difference (IV, Random, 95% CI) | -1.34 [-53.91, 51.24]   |
| 1.13.2 Sardinian folk dance                                | 1       | 19           | Mean Difference (IV, Random, 95% CI) | 238.80 [157.99, 319.61] |
| 1.14 Forward velocity (meter/second)                       | 1       | 48           | Mean Difference (IV, Random, 95% CI) | 0.10 [-0.10, 0.30]      |
| 1.15 Standing-start 180 degree turn test (number of steps) | 1       | 46           | Mean Difference (IV, Random, 95% CI) | 1.30 [-0.38, 2.98]      |
| 1.16 Standing-start 180 degree turn test (second)          | 1       | 46           | Mean Difference (IV, Random, 95% CI) | 0.40 [-0.18, 0.98]      |

|                                                                                              |   |    |                                      |                      |
|----------------------------------------------------------------------------------------------|---|----|--------------------------------------|----------------------|
| 1.17 Back Scratch Test (cm)                                                                  | 1 | 19 | Mean Difference (IV, Random, 95% CI) | 5.30 [-2.94, 13.54]  |
| 1.18 Spinal mouse: inclination score                                                         | 1 | 46 | Mean Difference (IV, Random, 95% CI) | 0.80 [-3.61, 5.21]   |
| 1.19 Adverse events: falls during study                                                      | 1 | 33 | Risk Ratio (M-H, Random, 95% CI)     | 0.56 [0.11, 2.90]    |
| 1.20 Cognitive function: Montreal Cognitive Assessment Scale                                 | 2 | 64 | Mean Difference (IV, Random, 95% CI) | 0.62 [-0.84, 2.08]   |
| 1.21 Activity participation: total current activity participation (Activity Card Sort score) | 1 | 52 | Mean Difference (IV, Random, 95% CI) | 8.00 [-4.40, 20.40]  |
| 1.22 Depressive symptoms: Beck Depression Inventory                                          | 3 | 86 | Mean Difference (IV, Random, 95% CI) | 0.51 [-4.90, 5.91]   |
| 1.23 Apathy : Apathy Scale                                                                   | 1 | 33 | Mean Difference (IV, Random, 95% CI) | 1.90 [-1.74, 5.54]   |
| 1.24 Fatigue: Krupp Fatigue Severity Scale                                                   | 2 | 46 | Mean Difference (IV, Random, 95% CI) | -1.46 [-12.14, 9.22] |
| 1.25 Quality of life: PDQ 39                                                                 | 2 | 77 | Mean Difference (IV, Random, 95% CI) | 2.25 [-3.69, 8.19]   |

## 2 Different forms of dance interventions

### 2.1 Dance for Parkinson's disease (D4PD) vs Tango

| Outcome or Subgroup                                  | Studies | Participants | Statistical Method                   | Effect Estimate        |
|------------------------------------------------------|---------|--------------|--------------------------------------|------------------------|
| 2.1 Disease severity : MDS-UPDRS III                 | 1       | 16           | Mean Difference (IV, Random, 95% CI) | 6.10 [-7.42, 19.62]    |
| 2.2 Agility: Time Up and Go Test (seconds)           | 1       | 16           | Mean Difference (IV, Random, 95% CI) | -0.30 [-1.63, 1.03]    |
| 2.3 Walking distance : Six-minute walk test (meters) | 1       | 16           | Mean Difference (IV, Random, 95% CI) | 36.30 [-49.15, 121.75] |
| 2.4 Forward velocity (meter/second)                  | 1       | 16           | Mean Difference (IV, Random, 95% CI) | 0.10 [-0.15, 0.35]     |
| 2.5 Quality of life : PDQ 39                         | 1       | 16           | Mean Difference (IV, Random, 95% CI) | 23.50 [-64.83, 111.83] |

### 2.2 Tango versus Mixed dance

| Outcome or Subgroup                                                                    | Studies | Participants | Statistical Method                   | Effect Estimate      |
|----------------------------------------------------------------------------------------|---------|--------------|--------------------------------------|----------------------|
| 2.2.1 Time Up and Go Test (TUG) seconds                                                | 1       | 18           | Mean Difference (IV, Random, 95% CI) | -1.60 [-3.75, 0.55]  |
| 2.2.2 Functional Gait Assessment (FGA)                                                 | 1       | 18           | Mean Difference (IV, Random, 95% CI) | 1.60 [-3.39, 6.59]   |
| 2.2.3 Freezing gait questionnaire                                                      | 1       | 18           | Mean Difference (IV, Random, 95% CI) | 1.60 [-3.95, 7.15]   |
| 2.2.4 Berg Balance Scale (BBS)                                                         | 1       | 18           | Mean Difference (IV, Fixed, 95% CI)  | 2.30 [-2.21, 6.81]   |
| 2.2.5 Disease severity (measured using MDS-UPDRS 2, motor experiences of daily living) | 1       | 18           | Mean Difference (IV, Random, 95% CI) | 1.20 [-6.21, 8.61]   |
| 2.2.6 Quality of life (PDQ-39)                                                         | 1       | 18           | Mean Difference (IV, Random, 95% CI) | -8.10 [-18.08, 1.88] |

### 2.3 Partnered versus non-partnered dance

| Outcome or Subgroup                | Studies | Participants | Statistical Method                   | Effect Estimate     |
|------------------------------------|---------|--------------|--------------------------------------|---------------------|
| 2.3.1 Balance : Berg Balance Scale | 1       | 39           | Mean Difference (IV, Random, 95% CI) | -0.80 [-5.32, 3.72] |

|                                     |   |    |                                      |                    |
|-------------------------------------|---|----|--------------------------------------|--------------------|
| 2.3.2 Time Up and Go Test (seconds) | 1 | 39 | Mean Difference (IV, Random, 95% CI) | 3.80 [-1.45, 9.05] |
|-------------------------------------|---|----|--------------------------------------|--------------------|

### 3 Dance versus different exercises

#### 3.1 Tango versus treadmill

| Outcome or Subgroup                                    | Studies | Participants | Statistical Method                   | Effect Estimate       |
|--------------------------------------------------------|---------|--------------|--------------------------------------|-----------------------|
| 3.1.1 Disease severity : MDS-UPDRS III                 | 1       |              | Mean Difference (IV, Random, 95% CI) | Subtotals only        |
| 3.1.1.1 3 months                                       | 1       | 65           | Mean Difference (IV, Random, 95% CI) | 2.40 [-3.41, 8.21]    |
| 3.1.1.2 6 months                                       | 1       | 65           | Mean Difference (IV, Random, 95% CI) | 2.00 [-3.87, 7.87]    |
| 3.1.2 Balance: Mini-BEST test                          | 1       |              | Mean Difference (IV, Random, 95% CI) | Subtotals only        |
| 3.2.2.1 3 months                                       | 1       | 65           | Mean Difference (IV, Random, 95% CI) | 0.00 [-1.82, 1.82]    |
| 3.2.2.2 6 months                                       | 1       | 65           | Mean Difference (IV, Random, 95% CI) | 0.70 [-1.52, 2.92]    |
| 3.1.3 Walking distance : Six-minute walk test (meters) | 1       |              | Mean Difference (IV, Random, 95% CI) | Subtotals only        |
| 3.1.3.1 3 months                                       | 1       | 65           | Mean Difference (IV, Random, 95% CI) | 6.00 [-55.23, 67.23]  |
| 3.1.3.2 6 months                                       | 1       | 65           | Mean Difference (IV, Random, 95% CI) | -2.00 [-62.99, 58.99] |
| 3.1.4 Forward velocity (meter/second)                  | 1       |              | Mean Difference (IV, Random, 95% CI) | Subtotals only        |
| 3.1.4.1 3 months                                       | 1       | 65           | Mean Difference (IV, Random, 95% CI) | -6.50 [-19.68, 6.68]  |
| 3.1.4.2 6 months                                       | 1       | 65           | Mean Difference (IV, Random, 95% CI) | -5.00 [-16.79, 6.79]  |
| 3.1.5 Quality of life : PDQ 39                         | 1       |              | Mean Difference (IV, Random, 95% CI) | Subtotals only        |
| 3.1.5.1 3 months                                       | 1       | 65           | Mean Difference (IV, Random, 95% CI) | 1.00 [-5.23, 7.23]    |
| 3.1.5.2 6 months                                       | 1       | 65           | Mean Difference (IV, Random, 95% CI) | 2.40 [-3.50, 8.30]    |

#### 3.2 Tango versus stretching or flexibility exercises

| Outcome or Subgroup                    | Studies | Participants | Statistical Method                   | Effect Estimate     |
|----------------------------------------|---------|--------------|--------------------------------------|---------------------|
| 3.2.1 Disease severity : MDS-UPDRS III | 2       |              | Mean Difference (IV, Random, 95% CI) | Subtotals only      |
| 3.2.1.1 1 3 months                     | 1       | 59           | Mean Difference (IV, Random, 95% CI) | 2.00 [-3.41, 7.41]  |
| 2.2.1.1.2 6 months                     | 2       | 78           | Mean Difference (IV, Random, 95% CI) | 0.71 [-2.75, 4.16]  |
| 3.2.2 Balance: Mini-BEST test          | 1       |              | Mean Difference (IV, Random, 95% CI) | Subtotals only      |
| 3.2.2.1 3 months                       | 1       | 59           | Mean Difference (IV, Random, 95% CI) | -0.90 [-3.01, 1.21] |
| 3.2.2.2 6 months                       | 1       | 59           | Mean Difference (IV, Random, 95% CI) | 0.40 [-2.27, 3.07]  |
| 3.2.2 Balance : Berg Balance Scale     | 1       | 19           | Mean Difference (IV, Random, 95% CI) | 3.50 [0.88, 6.12]   |
| 3.2.3 Freezing of gait questionnaire   | 1       | 19           | Mean Difference (IV, Random, 95% CI) | 0.90 [-0.64, 2.44]  |

|                                                       |   |    |                                      |                        |
|-------------------------------------------------------|---|----|--------------------------------------|------------------------|
| 3.2.4 Walking distance: Six-minute walk test (meters) | 1 |    | Mean Difference (IV, Random, 95% CI) | Subtotals only         |
| 3.2.4.1 3 months                                      | 1 | 59 | Mean Difference (IV, Random, 95% CI) | -14.00 [-83.35, 55.35] |
| 3.2.4.2 6 months                                      | 1 | 59 | Mean Difference (IV, Random, 95% CI) | -16.00 [-76.98, 44.98] |
| 3.2.5 Timed Up and Go Test (seconds)                  | 1 | 19 | Mean Difference (IV, Random, 95% CI) | -2.00 [-3.12, -0.88]   |
| 3.2.6 Forward velocity (meter/second)                 | 2 |    | Mean Difference (IV, Random, 95% CI) | Subtotals only         |
| 3.2.6.1 3 months                                      | 1 | 59 | Mean Difference (IV, Random, 95% CI) | -0.07 [-0.21, 0.07]    |
| 3.2.6.2 6 months                                      | 2 | 78 | Mean Difference (IV, Random, 95% CI) | -0.02 [-0.08, 0.04]    |
| 3.2.7 Dual-task walking velocity (meter/second)       | 1 | 19 | Mean Difference (IV, Random, 95% CI) | -0.08 [-0.33, 0.17]    |
| 3.2.8 Quality of life (PDQ 39)                        | 1 |    | Mean Difference (IV, Random, 95% CI) | Subtotals only         |
| 3.2.8.1 3 months                                      | 1 | 59 | Mean Difference (IV, Random, 95% CI) | 2.80 [-3.04, 8.64]     |
| 3.2.8.2 6 months                                      | 1 | 59 | Mean Difference (IV, Random, 95% CI) | 10.20 [7.00, 13.40]    |

### 3.3 Tango versus Tai-Chi

| Outcome or Subgroup                                          | Studies | Participants | Statistical Method                   | Effect Estimate     |
|--------------------------------------------------------------|---------|--------------|--------------------------------------|---------------------|
| 3.3.1 Quality of life (PDQ-39)                               | 1       | 29           | Mean Difference (IV, Random, 95% CI) | -1.60 [-9.65, 6.45] |
| 3.3.2 Brief Multidimensional Life Satisfaction Scale (BMLSS) | 1       | 29           | Mean Difference (IV, Random, 95% CI) | 3.30 [-9.71, 16.31] |

## 4 Dance versus physiotherapy

### 4.1 Irish dance versus physiotherapy

| Outcome or Subgroup                                      | Studies | Participants | Statistical Method                   | Effect Estimate      |
|----------------------------------------------------------|---------|--------------|--------------------------------------|----------------------|
| 4.1 Disease severity : MDS-UPDRS III                     | 1       | 24           | Mean Difference (IV, Random, 95% CI) | -3.60 [-6.42, -0.78] |
| 4.2 Balance: Berg Balance Scale                          | 1       | 24           | Mean Difference (IV, Random, 95% CI) | 7.20 [0.36, 14.04]   |
| 4.3 Freezing of Gait Questionnaire                       | 1       | 24           | Mean Difference (IV, Random, 95% CI) | -5.30 [-8.11, -2.49] |
| 4.4 Adverse events: fall (any cause) during study period | 1       | 24           | Risk Ratio (M-H, Random, 95% CI)     | 0.90 [0.60, 1.36]    |
| 4.5 Adverse events: fall during the time of intervention | 1       | 24           | Risk Ratio (M-H, Random, 95% CI)     | 3.00 [0.13, 67.06]   |
| 4.6 Quality of life: PDQ 39                              | 1       | 24           | Mean Difference (IV, Random, 95% CI) | -5.40 [-12.63, 1.83] |
